# Supplementary material for: Risk of ankylosing spondylitis following chronic tonsillitis and adenoiditis: a retrospective cohort study utilizing TriNetX global collaborative network
Source: Research Square preprint supplement (doi:10.21203/rs.3.rs-8106028/v1), 2026-02-22
Supplement: Supplementary file 1 [file ba38866b2c50a0c755aa7434.docx]

**Supplementary Table 1** Code of covariates

|  | ICD-10-CM |
| --- | --- |
| Social economic status |  |
| Persons with potential health hazards related to socioeconomic and psychosocial  circumstances | Z55-Z65 |
| Housing/economic circumstances problem | Z59 |
| Problems related to education and literacy | Z55 |
| Employment or unemployment problems | Z56 |
| Occupational exposure to risk factors | Z57 |
| Lifestyle |  |
| Personal history of nicotine dependence | Z87.891 |
| Nicotine dependence | F17 |
| Alcohol related disorders | F10 |
| Comorbidities |  |
| Overweight and obesity | E66 |
| Hypertension | I10 |
| Hyperlipidemia | E78.5 |
| Diabetes mellitus | E08-E13 |
| Asthma | J45 |
| Allergic rhinitis | J30.9 |
| Chronic sinusitis | J32 |
| Acute sinusitis | J01 |
| Atopic dermatitis | L20 |
| Obstructive sleep apnea | G47.33 |
| Rheumatoid arthritis | M06 |
| Sjögren syndrome | M35.0 |
| Medications |  |
| Corticosteroids for systemic use | ATC: H02 |
| Anti-inflammatory and antirheumatic products, non-steroids | ATC: M01A |
| Antihistamines for systemic use | ATC: R06 |
